# Supplementary material for: Application of Artificial Intelligence to Plasma Metabolomics Profiles to Predict Response to Neoadjuvant Chemotherapy in Triple-Negative Breast Cancer
Source: Front Artif Intell. 2022 Aug 11;5:876100. doi: 10.3389/frai.2022.876100 (PMC9403735; doi:10.3389/frai.2022.876100)
Supplement: Supplementary file 1 [file Table_1.xlsx]

## Sheet: Supplementary Table S1
Supplemental Table S1. Performance estimates of individual metabolites for distinguishing TNBC patients that had RCB-II/III following NACT compared to those that had RCB-0/I.
Metabolite	N0‡	N1‡	AUC (95% CI)	Sensitivity (95% CI) @ 95% sp	Specificity (95% CI) @ 95% sn	AUC (95% CI)_StageI/II	AUC (95% CI)_StageIII	Odds Ratio (95% CI)	Adjusted Odds Ratio (95% CI)†
1.linoleoylglycerol	62	26	0.51 [ 0.36 - 0.65 ]	0.15 [ 0.04 - 0.31 ]	0.08 [ 0.03 - 0.19 ]	0.52 [ 0.35 - 0.68 ]	0.5 [ 0.16 - 0.84 ]	1.11 [ 0.7 - 1.76 ]	1.08 [ 0.65 - 1.79 ]
1.Methylhistidine	62	26	0.52 [ 0.39 - 0.65 ]	0.08 [ 0 - 0.31 ]	0.18 [ 0.08 - 0.31 ]	0.52 [ 0.37 - 0.68 ]	0.54 [ 0.2 - 0.87 ]	1.15 [ 0.72 - 1.8 ]	1.18 [ 0.7 - 1.95 ]
1.Methylhistidine	62	26	0.42 [ 0.28 - 0.56 ]	0 [ 0 - 0.15 ]	0.08 [ 0.02 - 0.19 ]	0.44 [ 0.27 - 0.61 ]	0.36 [ 0.05 - 0.67 ]	0.75 [ 0.42 - 1.23 ]	0.74 [ 0.39 - 1.26 ]
2.aminobenzamide	62	26	0.47 [ 0.34 - 0.61 ]	0.08 [ 0 - 0.15 ]	0.05 [ 0 - 0.18 ]	0.5 [ 0.34 - 0.67 ]	0.27 [ 0 - 0.55 ]	1.34 [ 0.84 - 3.64 ]	1.42 [ 0.81 - 3.91 ]
2.Arachidonylglycerol	62	26	0.42 [ 0.29 - 0.54 ]	0 [ 0 - 0.08 ]	0.02 [ 0 - 0.18 ]	0.43 [ 0.29 - 0.58 ]	0.43 [ 0.1 - 0.76 ]	0.69 [ 0.4 - 1.12 ]	0.73 [ 0.41 - 1.26 ]
Acylcarnitine.C16.0	62	26	0.47 [ 0.34 - 0.61 ]	0.04 [ 0 - 0.19 ]	0.06 [ 0.02 - 0.19 ]	0.43 [ 0.29 - 0.58 ]	0.62 [ 0.32 - 0.93 ]	0.95 [ 0.59 - 1.5 ]	1 [ 0.61 - 1.65 ]
Acylcarnitine.C18.2n.6	62	26	0.49 [ 0.35 - 0.62 ]	0.08 [ 0 - 0.23 ]	0.03 [ 0 - 0.21 ]	0.49 [ 0.33 - 0.64 ]	0.52 [ 0.19 - 0.84 ]	1.1 [ 0.68 - 1.73 ]	1.05 [ 0.65 - 1.68 ]
ADENOSINE.5..MONOPHOSPHATE	62	26	0.64 [ 0.51 - 0.77 ]	0.08 [ 0 - 0.35 ]	0.15 [ 0.06 - 0.47 ]	0.65 [ 0.5 - 0.8 ]	0.64 [ 0.34 - 0.94 ]	1.58 [ 1 - 2.57 ]	1.7 [ 1.04 - 2.9 ]
Alloxan	62	26	0.54 [ 0.41 - 0.68 ]	0.12 [ 0 - 0.31 ]	0.15 [ 0.05 - 0.27 ]	0.5 [ 0.35 - 0.66 ]	0.7 [ 0.4 - 0.99 ]	1.22 [ 0.77 - 1.92 ]	1.33 [ 0.82 - 2.19 ]
ALPHA.D.GLUCOSE	62	26	0.5 [ 0.35 - 0.64 ]	0.12 [ 0 - 0.38 ]	0.08 [ 0 - 0.31 ]	0.51 [ 0.35 - 0.67 ]	0.43 [ 0.1 - 0.76 ]	1.16 [ 0.73 - 1.82 ]	1.17 [ 0.72 - 1.89 ]
ALPHA.D.GLUCOSE	62	26	0.47 [ 0.34 - 0.6 ]	0.08 [ 0 - 0.27 ]	0.15 [ 0.02 - 0.29 ]	0.48 [ 0.33 - 0.64 ]	0.5 [ 0.18 - 0.82 ]	1.02 [ 0.63 - 1.61 ]	1.03 [ 0.61 - 1.71 ]
Alpha.N.Phenylacetyl.L.glutamine	62	26	0.47 [ 0.33 - 0.61 ]	0.08 [ 0 - 0.23 ]	0.05 [ 0 - 0.19 ]	0.44 [ 0.27 - 0.61 ]	0.54 [ 0.2 - 0.87 ]	1.21 [ 0.77 - 2.02 ]	1.28 [ 0.78 - 2.37 ]
Aspartyl.Threonine	62	26	0.54 [ 0.4 - 0.67 ]	0.12 [ 0 - 0.27 ]	0.11 [ 0.02 - 0.24 ]	0.56 [ 0.41 - 0.72 ]	0.27 [ 0 - 0.54 ]	1.28 [ 0.81 - 2.04 ]	1.24 [ 0.76 - 2.02 ]
BILIVERDIN	62	26	0.55 [ 0.41 - 0.68 ]	0.04 [ 0 - 0.23 ]	0.11 [ 0.05 - 0.32 ]	0.58 [ 0.43 - 0.74 ]	0.34 [ 0.04 - 0.64 ]	0.99 [ 0.6 - 1.55 ]	0.91 [ 0.53 - 1.45 ]
CAFFEINE	62	26	0.45 [ 0.31 - 0.59 ]	0.08 [ 0 - 0.19 ]	0 [ 0 - 0.06 ]	0.52 [ 0.36 - 0.68 ]	0.25 [ 0 - 0.53 ]	0.95 [ 0.55 - 1.48 ]	1.09 [ 0.63 - 1.76 ]
CAFFEINE	62	26	0.47 [ 0.34 - 0.61 ]	0.08 [ 0 - 0.19 ]	0.1 [ 0.03 - 0.21 ]	0.54 [ 0.38 - 0.69 ]	0.23 [ 0 - 0.52 ]	0.94 [ 0.54 - 1.48 ]	1.09 [ 0.62 - 1.75 ]
Cholesterol.glucuronide	62	26	0.55 [ 0.41 - 0.68 ]	0.04 [ 0 - 0.31 ]	0.18 [ 0.1 - 0.32 ]	0.53 [ 0.37 - 0.69 ]	0.57 [ 0.24 - 0.9 ]	1.22 [ 0.77 - 1.97 ]	1.26 [ 0.78 - 2.05 ]
Choline	62	26	0.55 [ 0.42 - 0.69 ]	0.12 [ 0 - 0.23 ]	0.02 [ 0 - 0.29 ]	0.56 [ 0.4 - 0.71 ]	0.46 [ 0.13 - 0.8 ]	1.19 [ 0.75 - 1.9 ]	1.16 [ 0.7 - 1.91 ]
Choline	62	26	0.53 [ 0.39 - 0.66 ]	0.04 [ 0 - 0.19 ]	0.02 [ 0 - 0.21 ]	0.54 [ 0.38 - 0.69 ]	0.43 [ 0.09 - 0.77 ]	1.07 [ 0.67 - 1.7 ]	1 [ 0.61 - 1.65 ]
CORTISOL	62	26	0.45 [ 0.31 - 0.59 ]	0.12 [ 0 - 0.27 ]	0 [ 0 - 0.06 ]	0.47 [ 0.31 - 0.63 ]	0.38 [ 0.02 - 0.73 ]	0.93 [ 0.56 - 1.46 ]	0.76 [ 0.44 - 1.27 ]
CORTISONE	62	26	0.59 [ 0.46 - 0.72 ]	0.04 [ 0 - 0.27 ]	0.19 [ 0.11 - 0.32 ]	0.59 [ 0.44 - 0.73 ]	0.5 [ 0.17 - 0.83 ]	1.18 [ 0.74 - 1.86 ]	1.24 [ 0.69 - 2.27 ]
DEOXYCARNITINE	62	26	0.59 [ 0.46 - 0.72 ]	0.08 [ 0 - 0.27 ]	0.08 [ 0.02 - 0.34 ]	0.59 [ 0.44 - 0.74 ]	0.61 [ 0.29 - 0.92 ]	1.31 [ 0.83 - 2.07 ]	1.41 [ 0.86 - 2.32 ]
Diacetylspermidine	62	26	0.54 [ 0.4 - 0.67 ]	0.08 [ 0 - 0.23 ]	0.08 [ 0 - 0.26 ]	0.49 [ 0.33 - 0.65 ]	0.75 [ 0.45 - 1 ]	1.15 [ 0.72 - 1.8 ]	1.15 [ 0.71 - 1.85 ]
DIACETYLSPERMINE	62	26	0.58 [ 0.46 - 0.71 ]	0.15 [ 0 - 0.31 ]	0.24 [ 0.1 - 0.39 ]	0.49 [ 0.35 - 0.63 ]	0.88 [ 0.63 - 1 ]	1.39 [ 0.89 - 2.23 ]	1.26 [ 0.77 - 2.1 ]
Dodecanedioylcarnitine	62	26	0.44 [ 0.32 - 0.57 ]	0 [ 0 - 0.08 ]	0.08 [ 0.02 - 0.26 ]	0.46 [ 0.31 - 0.61 ]	0.45 [ 0.12 - 0.77 ]	0.73 [ 0.42 - 1.18 ]	0.76 [ 0.42 - 1.3 ]
Dodecanoic.acid	62	26	0.52 [ 0.38 - 0.65 ]	0.08 [ 0 - 0.27 ]	0 [ 0 - 0.37 ]	0.51 [ 0.37 - 0.66 ]	0.55 [ 0.22 - 0.88 ]	1.05 [ 0.66 - 1.67 ]	1 [ 0.61 - 1.64 ]
Glycerophosphocholine	62	26	0.56 [ 0.42 - 0.7 ]	0.12 [ 0 - 0.35 ]	0.06 [ 0 - 0.24 ]	0.57 [ 0.4 - 0.73 ]	0.61 [ 0.29 - 0.92 ]	1.32 [ 0.83 - 2.09 ]	1.65 [ 1.01 - 2.8 ]
HYPOXANTHINE.	62	26	0.49 [ 0.37 - 0.62 ]	0.04 [ 0 - 0.15 ]	0.15 [ 0 - 0.39 ]	0.48 [ 0.34 - 0.62 ]	0.54 [ 0.21 - 0.86 ]	0.98 [ 0.59 - 1.54 ]	0.89 [ 0.5 - 1.44 ]
INDOLE.3.ACETALDEHYDE	62	26	0.59 [ 0.46 - 0.72 ]	0.12 [ 0 - 0.27 ]	0.1 [ 0.02 - 0.37 ]	0.61 [ 0.47 - 0.75 ]	0.46 [ 0.15 - 0.78 ]	1.17 [ 0.73 - 1.82 ]	1.2 [ 0.74 - 1.9 ]
Indoleacrylic.acid	62	26	0.46 [ 0.33 - 0.59 ]	0 [ 0 - 0 ]	0.06 [ 0 - 0.23 ]	0.45 [ 0.3 - 0.6 ]	0.41 [ 0.1 - 0.73 ]	0.77 [ 0.46 - 1.24 ]	0.74 [ 0.43 - 1.22 ]
L.ARGININE	62	26	0.5 [ 0.38 - 0.63 ]	0.04 [ 0 - 0.19 ]	0.19 [ 0.08 - 0.32 ]	0.51 [ 0.36 - 0.66 ]	0.43 [ 0.11 - 0.75 ]	1.03 [ 0.64 - 1.63 ]	1.03 [ 0.63 - 1.69 ]
L.ARGININE	62	26	0.51 [ 0.38 - 0.64 ]	0.08 [ 0 - 0.19 ]	0.15 [ 0.06 - 0.29 ]	0.52 [ 0.37 - 0.67 ]	0.43 [ 0.1 - 0.76 ]	1.08 [ 0.68 - 1.72 ]	1.06 [ 0.64 - 1.74 ]
L.carnitine	62	26	0.55 [ 0.42 - 0.69 ]	0.12 [ 0 - 0.31 ]	0.11 [ 0.02 - 0.24 ]	0.5 [ 0.34 - 0.67 ]	0.66 [ 0.36 - 0.96 ]	1.2 [ 0.76 - 1.94 ]	1.1 [ 0.66 - 1.85 ]
L.carnitine	62	26	0.54 [ 0.41 - 0.67 ]	0.04 [ 0 - 0.15 ]	0.13 [ 0.05 - 0.29 ]	0.47 [ 0.32 - 0.63 ]	0.71 [ 0.43 - 1 ]	1.15 [ 0.72 - 1.85 ]	1.02 [ 0.6 - 1.71 ]
L.CYSTINE	62	26	0.63 [ 0.5 - 0.75 ]	0.15 [ 0.04 - 0.31 ]	0.19 [ 0.08 - 0.31 ]	0.61 [ 0.46 - 0.76 ]	0.68 [ 0.39 - 0.97 ]	1.61 [ 1.02 - 2.64 ]	1.77 [ 1 - 3.28 ]
L.GLUTAMIC.ACID	62	26	0.55 [ 0.41 - 0.69 ]	0.12 [ 0 - 0.27 ]	0.05 [ 0 - 0.24 ]	0.59 [ 0.43 - 0.76 ]	0.5 [ 0.18 - 0.82 ]	1.19 [ 0.75 - 1.91 ]	1.28 [ 0.78 - 2.15 ]
L.GLUTAMINE	62	26	0.53 [ 0.39 - 0.67 ]	0.12 [ 0 - 0.31 ]	0.15 [ 0.06 - 0.26 ]	0.58 [ 0.4 - 0.75 ]	0.43 [ 0.11 - 0.75 ]	1.2 [ 0.75 - 1.94 ]	1.25 [ 0.76 - 2.1 ]
L.GLUTAMINE	62	26	0.52 [ 0.38 - 0.66 ]	0.08 [ 0 - 0.31 ]	0.03 [ 0 - 0.23 ]	0.5 [ 0.34 - 0.66 ]	0.52 [ 0.19 - 0.84 ]	1.08 [ 0.67 - 1.68 ]	0.97 [ 0.55 - 1.63 ]
L.HISTIDINE	62	26	0.5 [ 0.36 - 0.64 ]	0.12 [ 0 - 0.31 ]	0.1 [ 0 - 0.23 ]	0.55 [ 0.39 - 0.72 ]	0.36 [ 0.04 - 0.67 ]	1.05 [ 0.65 - 1.66 ]	1.14 [ 0.68 - 1.89 ]
L.PROLINE	62	26	0.47 [ 0.33 - 0.6 ]	0.08 [ 0 - 0.31 ]	0.08 [ 0 - 0.27 ]	0.43 [ 0.28 - 0.59 ]	0.68 [ 0.38 - 0.98 ]	1.04 [ 0.64 - 1.63 ]	1.16 [ 0.69 - 1.9 ]
L.VALINE	62	26	0.55 [ 0.4 - 0.7 ]	0.15 [ 0.04 - 0.35 ]	0.1 [ 0.02 - 0.19 ]	0.61 [ 0.44 - 0.78 ]	0.54 [ 0.21 - 0.86 ]	1.48 [ 0.95 - 2.44 ]	1.58 [ 0.96 - 2.69 ]
LAUROYLCARNITINE	62	26	0.45 [ 0.32 - 0.58 ]	0 [ 0 - 0.08 ]	0.06 [ 0 - 0.19 ]	0.4 [ 0.25 - 0.55 ]	0.66 [ 0.37 - 0.95 ]	0.72 [ 0.38 - 1.19 ]	0.75 [ 0.37 - 1.32 ]
Lysophosphatidylcholine.14.0	62	26	0.47 [ 0.35 - 0.59 ]	0 [ 0 - 0.08 ]	0.18 [ 0.02 - 0.34 ]	0.5 [ 0.36 - 0.64 ]	0.46 [ 0.12 - 0.81 ]	0.78 [ 0.45 - 1.26 ]	0.88 [ 0.49 - 1.46 ]
Lysophosphatidylcholine.15.0	62	26	0.5 [ 0.38 - 0.63 ]	0.08 [ 0 - 0.19 ]	0.18 [ 0.05 - 0.36 ]	0.51 [ 0.37 - 0.66 ]	0.45 [ 0.12 - 0.77 ]	1.03 [ 0.64 - 1.62 ]	1.13 [ 0.67 - 1.89 ]
Lysophosphatidylcholine.16.0	62	26	0.37 [ 0.25 - 0.49 ]	0 [ 0 - 0 ]	0.03 [ 0 - 0.19 ]	0.35 [ 0.22 - 0.48 ]	0.43 [ 0.11 - 0.75 ]	0.66 [ 0.4 - 1.04 ]	0.67 [ 0.4 - 1.11 ]
Lysophosphatidylcholine.16.1	62	26	0.42 [ 0.29 - 0.54 ]	0.04 [ 0 - 0.12 ]	0.05 [ 0 - 0.21 ]	0.41 [ 0.27 - 0.55 ]	0.5 [ 0.17 - 0.83 ]	0.68 [ 0.39 - 1.12 ]	0.75 [ 0.41 - 1.27 ]
Lysophosphatidylcholine.16.1	62	26	0.45 [ 0.32 - 0.57 ]	0 [ 0 - 0.12 ]	0.13 [ 0.03 - 0.32 ]	0.45 [ 0.31 - 0.58 ]	0.46 [ 0.14 - 0.79 ]	0.75 [ 0.44 - 1.21 ]	0.79 [ 0.44 - 1.33 ]
Lysophosphatidylcholine.17.0	62	26	0.54 [ 0.42 - 0.66 ]	0.04 [ 0 - 0.12 ]	0.21 [ 0.02 - 0.37 ]	0.51 [ 0.38 - 0.65 ]	0.59 [ 0.25 - 0.92 ]	0.99 [ 0.62 - 1.57 ]	1 [ 0.59 - 1.66 ]
Lysophosphatidylcholine.17.0	62	26	0.55 [ 0.42 - 0.68 ]	0 [ 0 - 0.12 ]	0.11 [ 0.03 - 0.26 ]	0.53 [ 0.38 - 0.67 ]	0.59 [ 0.25 - 0.93 ]	1.13 [ 0.71 - 1.79 ]	1.18 [ 0.7 - 1.98 ]
Lysophosphatidylcholine.17.1	62	26	0.5 [ 0.38 - 0.63 ]	0 [ 0 - 0.12 ]	0.15 [ 0 - 0.34 ]	0.49 [ 0.35 - 0.63 ]	0.59 [ 0.26 - 0.92 ]	0.87 [ 0.51 - 1.38 ]	0.91 [ 0.52 - 1.52 ]
Lysophosphatidylcholine.18.0	62	26	0.46 [ 0.34 - 0.59 ]	0 [ 0 - 0.15 ]	0.1 [ 0.02 - 0.24 ]	0.46 [ 0.32 - 0.6 ]	0.59 [ 0.27 - 0.9 ]	0.85 [ 0.52 - 1.35 ]	0.89 [ 0.52 - 1.48 ]
Lysophosphatidylcholine.18.1	62	26	0.51 [ 0.38 - 0.64 ]	0 [ 0 - 0.12 ]	0.1 [ 0 - 0.26 ]	0.52 [ 0.38 - 0.67 ]	0.46 [ 0.14 - 0.79 ]	0.97 [ 0.6 - 1.53 ]	1.06 [ 0.63 - 1.77 ]
Lysophosphatidylcholine.18.2	62	26	0.48 [ 0.35 - 0.61 ]	0 [ 0 - 0.12 ]	0.1 [ 0 - 0.27 ]	0.49 [ 0.35 - 0.63 ]	0.41 [ 0.09 - 0.73 ]	0.79 [ 0.39 - 1.3 ]	0.78 [ 0.36 - 1.37 ]
Lysophosphatidylcholine.18.2	62	26	0.51 [ 0.39 - 0.63 ]	0 [ 0 - 0.12 ]	0.18 [ 0.05 - 0.37 ]	0.54 [ 0.4 - 0.67 ]	0.45 [ 0.11 - 0.78 ]	0.95 [ 0.58 - 1.49 ]	1.04 [ 0.61 - 1.73 ]
Lysophosphatidylcholine.20.2	62	26	0.42 [ 0.29 - 0.55 ]	0.04 [ 0 - 0.15 ]	0.06 [ 0 - 0.19 ]	0.41 [ 0.26 - 0.56 ]	0.57 [ 0.25 - 0.89 ]	0.8 [ 0.46 - 1.28 ]	0.88 [ 0.49 - 1.45 ]
Lysophosphatidylcholine.20.3	62	26	0.44 [ 0.31 - 0.56 ]	0.04 [ 0 - 0.12 ]	0.06 [ 0.02 - 0.19 ]	0.46 [ 0.31 - 0.61 ]	0.43 [ 0.1 - 0.76 ]	0.86 [ 0.51 - 1.36 ]	0.93 [ 0.54 - 1.51 ]
Lysophosphatidylcholine.20.4	62	26	0.48 [ 0.34 - 0.61 ]	0.04 [ 0 - 0.19 ]	0.02 [ 0 - 0.19 ]	0.53 [ 0.37 - 0.68 ]	0.32 [ 0.01 - 0.63 ]	0.91 [ 0.57 - 1.44 ]	0.95 [ 0.56 - 1.59 ]
Lysophosphatidylcholine.20.4	62	26	0.48 [ 0.35 - 0.61 ]	0.04 [ 0 - 0.12 ]	0.06 [ 0 - 0.31 ]	0.51 [ 0.36 - 0.65 ]	0.45 [ 0.13 - 0.77 ]	0.9 [ 0.54 - 1.42 ]	0.98 [ 0.57 - 1.6 ]
Lysophosphatidylcholine.22.5	62	26	0.46 [ 0.32 - 0.59 ]	0.04 [ 0 - 0.12 ]	0 [ 0 - 0.26 ]	0.46 [ 0.31 - 0.61 ]	0.5 [ 0.16 - 0.84 ]	0.84 [ 0.5 - 1.33 ]	0.9 [ 0.53 - 1.48 ]
Lysophosphatidylcholine.22.6	62	26	0.46 [ 0.32 - 0.59 ]	0.08 [ 0 - 0.23 ]	0.05 [ 0 - 0.23 ]	0.42 [ 0.26 - 0.58 ]	0.59 [ 0.27 - 0.9 ]	0.88 [ 0.52 - 1.4 ]	0.92 [ 0.53 - 1.52 ]
Lysophosphatidylcholine.24.0	62	26	0.49 [ 0.37 - 0.62 ]	0.08 [ 0 - 0.19 ]	0.23 [ 0 - 0.36 ]	0.44 [ 0.3 - 0.59 ]	0.55 [ 0.23 - 0.88 ]	1.04 [ 0.63 - 1.62 ]	1.02 [ 0.6 - 1.63 ]
Lysophosphatidylethanolamine.18.0	62	26	0.48 [ 0.36 - 0.61 ]	0 [ 0 - 0.08 ]	0.11 [ 0.03 - 0.29 ]	0.48 [ 0.33 - 0.62 ]	0.5 [ 0.17 - 0.83 ]	0.87 [ 0.53 - 1.38 ]	0.96 [ 0.56 - 1.6 ]
Lysophosphatidylethanolamine.18.1	62	26	0.45 [ 0.32 - 0.57 ]	0 [ 0 - 0.08 ]	0.08 [ 0.02 - 0.24 ]	0.47 [ 0.34 - 0.61 ]	0.41 [ 0.09 - 0.74 ]	0.71 [ 0.4 - 1.15 ]	0.72 [ 0.38 - 1.25 ]
Lysophosphatidylethanolamine.18.2	62	26	0.46 [ 0.33 - 0.59 ]	0 [ 0 - 0.12 ]	0.08 [ 0.02 - 0.21 ]	0.47 [ 0.32 - 0.62 ]	0.38 [ 0.07 - 0.68 ]	0.84 [ 0.51 - 1.34 ]	0.92 [ 0.53 - 1.55 ]
Lysophosphatidylethanolamine.18.2	62	26	0.49 [ 0.36 - 0.62 ]	0.04 [ 0 - 0.12 ]	0.15 [ 0.02 - 0.29 ]	0.5 [ 0.35 - 0.64 ]	0.57 [ 0.26 - 0.88 ]	0.94 [ 0.57 - 1.48 ]	1.02 [ 0.59 - 1.73 ]
Lysophosphatidylethanolamine.22.0	62	26	0.56 [ 0.43 - 0.7 ]	0 [ 0 - 0.35 ]	0.15 [ 0 - 0.29 ]	0.55 [ 0.4 - 0.7 ]	0.61 [ 0.29 - 0.92 ]	1.15 [ 0.73 - 1.81 ]	1.14 [ 0.69 - 1.87 ]
Lysophosphatidylethanolamine.22.6	62	26	0.43 [ 0.3 - 0.56 ]	0.08 [ 0 - 0.23 ]	0.05 [ 0 - 0.19 ]	0.41 [ 0.25 - 0.56 ]	0.5 [ 0.16 - 0.84 ]	0.84 [ 0.5 - 1.34 ]	0.86 [ 0.5 - 1.41 ]
Metformin	62	26	0.59 [ 0.47 - 0.72 ]	0.08 [ 0 - 0.23 ]	0.19 [ 0.03 - 0.47 ]	0.57 [ 0.42 - 0.71 ]	0.68 [ 0.38 - 0.97 ]	1.92 [ 1.01 - 14.57 ]	2.21 [ 1.08 - 20.7 ]
N..3.acetamidopropyl.pyrrolidin.2.one	62	26	0.55 [ 0.42 - 0.68 ]	0.12 [ 0 - 0.27 ]	0.1 [ 0.02 - 0.32 ]	0.51 [ 0.36 - 0.66 ]	0.71 [ 0.44 - 0.99 ]	1.34 [ 0.86 - 2.26 ]	1.33 [ 0.79 - 2.46 ]
N..3.acetamidopropyl.pyrrolidin.2.one	62	26	0.53 [ 0.4 - 0.67 ]	0.19 [ 0.04 - 0.38 ]	0.06 [ 0 - 0.26 ]	0.5 [ 0.34 - 0.66 ]	0.62 [ 0.32 - 0.93 ]	1.33 [ 0.85 - 2.27 ]	1.3 [ 0.77 - 2.39 ]
N.PAI..METHYL.L.HISTIDINE	62	26	0.45 [ 0.31 - 0.58 ]	0.04 [ 0 - 0.15 ]	0.1 [ 0.03 - 0.23 ]	0.46 [ 0.29 - 0.62 ]	0.41 [ 0.1 - 0.73 ]	0.89 [ 0.52 - 1.4 ]	0.87 [ 0.47 - 1.44 ]
N8.ACETYLSPERMIDINE	62	26	0.6 [ 0.47 - 0.73 ]	0.12 [ 0 - 0.27 ]	0.21 [ 0.11 - 0.34 ]	0.53 [ 0.37 - 0.68 ]	0.77 [ 0.47 - 1 ]	1.35 [ 0.86 - 2.14 ]	1.25 [ 0.77 - 2.07 ]
N8.ACETYLSPERMIDINE	62	26	0.59 [ 0.46 - 0.71 ]	0.12 [ 0 - 0.23 ]	0.19 [ 0.1 - 0.31 ]	0.51 [ 0.35 - 0.67 ]	0.77 [ 0.47 - 1 ]	1.34 [ 0.85 - 2.1 ]	1.24 [ 0.76 - 2.04 ]
NG..NG.dimethyl.L.arginine	62	26	0.58 [ 0.45 - 0.71 ]	0.04 [ 0 - 0.15 ]	0.06 [ 0 - 0.32 ]	0.56 [ 0.4 - 0.71 ]	0.64 [ 0.33 - 0.95 ]	1.43 [ 0.91 - 2.39 ]	1.39 [ 0.86 - 2.4 ]
PARAXANTHINE	62	26	0.46 [ 0.33 - 0.59 ]	0.08 [ 0 - 0.19 ]	0.1 [ 0 - 0.24 ]	0.48 [ 0.33 - 0.63 ]	0.38 [ 0.06 - 0.69 ]	0.91 [ 0.52 - 1.43 ]	0.98 [ 0.56 - 1.57 ]
piperine	62	26	0.43 [ 0.3 - 0.56 ]	0 [ 0 - 0.19 ]	0.05 [ 0 - 0.18 ]	0.46 [ 0.31 - 0.61 ]	0.21 [ 0 - 0.47 ]	0.66 [ 0.34 - 1.13 ]	0.61 [ 0.29 - 1.11 ]
Plas_Lysophosphatidylcholine.P.18.0.0.0..or.Plas_Lysophosphatidylcholine.O.18.1	62	26	0.5 [ 0.37 - 0.63 ]	0.08 [ 0 - 0.19 ]	0.11 [ 0.03 - 0.23 ]	0.49 [ 0.34 - 0.65 ]	0.57 [ 0.26 - 0.89 ]	1.06 [ 0.66 - 1.68 ]	1.23 [ 0.74 - 2.05 ]
PlasLysophosphatidylcholine.P.16.0	62	26	0.48 [ 0.35 - 0.61 ]	0 [ 0 - 0 ]	0.08 [ 0.02 - 0.21 ]	0.46 [ 0.3 - 0.62 ]	0.48 [ 0.15 - 0.82 ]	0.85 [ 0.51 - 1.35 ]	0.88 [ 0.52 - 1.45 ]
TRIGONELLINE	62	26	0.51 [ 0.38 - 0.64 ]	0.04 [ 0 - 0.15 ]	0.13 [ 0.05 - 0.26 ]	0.53 [ 0.38 - 0.68 ]	0.45 [ 0.12 - 0.77 ]	0.97 [ 0.55 - 1.52 ]	1.04 [ 0.59 - 1.65 ]
TYRAMINE	62	26	0.41 [ 0.28 - 0.53 ]	0 [ 0 - 0.12 ]	0.06 [ 0 - 0.18 ]	0.43 [ 0.29 - 0.58 ]	0.36 [ 0.05 - 0.66 ]	0.69 [ 0.4 - 1.12 ]	0.71 [ 0.41 - 1.16 ]
URATE	62	26	0.57 [ 0.43 - 0.7 ]	0.15 [ 0 - 0.31 ]	0.16 [ 0.03 - 0.34 ]	0.56 [ 0.41 - 0.71 ]	0.61 [ 0.26 - 0.95 ]	1.43 [ 0.9 - 2.33 ]	1.44 [ 0.84 - 2.53 ]
X1.METHYLNICOTINAMIDE	62	26	0.54 [ 0.41 - 0.68 ]	0.12 [ 0 - 0.31 ]	0.1 [ 0.03 - 0.24 ]	0.57 [ 0.41 - 0.73 ]	0.34 [ 0.02 - 0.66 ]	1.29 [ 0.82 - 2.05 ]	1.21 [ 0.74 - 1.98 ]
‡ N0: TNBC patients that had a pCR or RCB-I following NACT; N1: TNBC patients that had a RCB-II or RCB-III following NACT
† age and stage were included as co-variables in adjusted Odd Ratios
